# Supplementary material
Source: PubMed Central journal article supplement (PMC7870560)
Supplement: NIHMS1647576-supplement-1.pdf [file NIHMS1647576-supplement-1.pdf]

## Supplementary Materials

### Materials and Methods

#### *Statistical Analyses*

In exploratory analyses, the relationship between the five domain scores of the FCI-SF (Mental Calculation, Financial Conceptual Knowledge, Single Checkbook Register, Complex Checkbook Register, Bank Statement Management) and regional tau was assessed. The 2 tau regions with strongest associations in the primary analyses (entorhinal cortex and inferior temporal cortex) were included in the same models but with FCI-SF domain scores instead of total score.

### Results

Linear regression models with backward elimination were run for tau regions across all participants utilizing the five domain scores of the FCI-SF Mental Calculation, Financial Conceptual Knowledge, Single Checkbook Register, Complex Checkbook Register, Bank Statement Management with education, age, sex, RAVLT Total Learning Score, and TMT-B as covariates. Results showed that Mental Calculation was significantly associated with greater tau burden in both regions (entorhinal cortex:  $\beta=-0.48$ , 95% CI=-0.86, -0.09,  $p=0.02$ ; inferior temporal cortex:  $\beta=-0.54$ , 95% CI=-0.88, -0.21,  $p=0.002$ ). Financial Conceptual knowledge also showed a significant association with greater tau burden in both regions (entorhinal cortex:  $\beta=-0.67$ , 95% CI=-1.06, -0.29,  $p=0.001$ ; inferior temporal cortex:  $\beta=-0.57$ , 95% CI=-0.90, -0.23,  $p=0.001$ ). FCI Single Checkbook registers also showed a significant association with greater tau burden in both regions (entorhinal cortex:  $\beta=-1.55$ , 95% CI=-2.57, -0.54,  $p=0.003$ ; inferior temporal cortex:  $\beta=-1.26$ , 95% CI=-2.16, -0.35,  $p=0.007$ ). FCI Complex Checkbook register was also shown to be significantly

## FINANCIAL CAPACITY AND TAU BURDEN

associated with entorhinal cortex ( $\beta=-3.13$ , 95% CI=-4.89, -1.37,  $pr=-0.14$ ,  $p=0.001$ ) and inferior temporal cortex ( $\beta=-3.21$ , 95% CI=-4.77, -1.64,  $pr=-0.16$ ,  $p<0.001$ ). Lastly, FCI Bank Statement Management was also shown to be significantly associated with entorhinal ( $\beta=-1.19$ , 95% CI=-1.98, -0.40,  $pr=-0.12$ ,  $p=0.003$ ) and inferior temporal cortex ( $\beta=-0.87$ , 95% CI=-1.57, -0.16,  $pr=-0.10$ ,  $p=0.02$ ).
